# Supplementary material for: Ferromagnetic exchange in a twisted, oxime-bridged [MnIII2] dimer
Source: Royal Society of Chemistry journal article supplement (doi:10.1039/c2dt30674c), 2012-01-01
Supplement: c2dt30674c.pdf [file c2dt30674c.pdf]

Electronic Supplementary Information

Ferromagnetic exchange in a twisted, oxime-bridged [Mn<sup>III</sup><sub>2</sub>]  
dimer

Edel Houton,<sup>a</sup> Stephanie M. Taylor,<sup>b</sup> Christopher C. Beedle,<sup>c</sup> Joan Cano,<sup>d</sup> Stergios Piligkos,<sup>e</sup> Stephen Hill,<sup>c,f</sup> Alan G. Ryder,<sup>\*a</sup> Euan K. Brechin<sup>\*b</sup> and Leigh F Jones<sup>\*a</sup>

Table S1 Crystal data for complex 1

|                                       |                                                                                |
|---------------------------------------|--------------------------------------------------------------------------------|
|                                       | [Mn <sub>2</sub> ].4MeOH (1)                                                   |
| Formula <sup>a</sup>                  | C <sub>50</sub> H <sub>54</sub> N <sub>4</sub> O <sub>14</sub> Mn <sub>2</sub> |
| M <sub>w</sub>                        | 1044.85                                                                        |
| Crystal System                        | Orthorhombic                                                                   |
| Space group                           | Pbca                                                                           |
| a/Å                                   | 8.4931(17)                                                                     |
| b/Å                                   | 22.495(5)                                                                      |
| c/Å                                   | 24.783(5)                                                                      |
| α/°                                   | 90                                                                             |
| β/°                                   | 90                                                                             |
| γ/°                                   | 90                                                                             |
| V/Å <sup>3</sup>                      | 4734.9(16)                                                                     |
| Z                                     | 4                                                                              |
| T/K                                   | 150(2)                                                                         |
| λ <sup>b</sup> /Å                     | 0.7107                                                                         |
| D <sub>c</sub> /g cm <sup>-3</sup>    | 1.466                                                                          |
| μ(Mo-Kα)/ mm <sup>-1</sup>            | 0.607                                                                          |
| Meas./indep.(R <sub>int</sub> ) refl. | 14243 / 4330(0.0264)                                                           |
| wR2 (all data)                        | 0.0984                                                                         |
| R1 <sup>d,e</sup>                     | 0.0384                                                                         |
| Goodness of fit on F <sup>2</sup>     | 1.133                                                                          |

<sup>a</sup> Includes guest molecules. <sup>b</sup> Mo-Kα radiation, graphite monochromator. <sup>c</sup> wR2 = [Σw(|F<sub>o</sub><sup>2</sup>| - |F<sub>c</sub><sup>2</sup>|)<sup>2</sup> / Σw|F<sub>o</sub><sup>2</sup>|<sup>2</sup>]<sup>1/2</sup>. <sup>d</sup> For observed data. <sup>e</sup> R1 = Σ||F<sub>o</sub>| - |F<sub>c</sub>|| / Σ|F<sub>o</sub>|.

FT-IR and Raman Measurements on [Mn<sup>III</sup><sub>2</sub>(Naph-sao)<sub>2</sub>(MeOH)<sub>2</sub>].4MeOH (1)

FT-IR and Raman experimental information

Infra-red spectra were recorded on a Perkin Elmer FT-IR *Spectrum One* spectrometer equipped with a Universal ATR Sampling accessory. Raman measurements were recorded at room temperature using a Kaiser Optical Systems Raman spectrometer (*RamanRxn2<sup>TM</sup> 1000 Analyzer*) equipped with a 993 nm laser diode excitation source and an InGaAs

array detector. A laser power of ~200 mW (at the sample) with an exposure time of  $10 \times 8$  seconds was used and spectra were collected from 250 to  $4000\text{ cm}^{-1}$  (at a resolution of  $5\text{ cm}^{-1}$ ). Raman spectra of the coloured complex **1** was collected from a solid dispersion (approximately 1.5% by weight of complex) in dry KBr which was pressed into a disk using a hydraulic press and a 13 mm die set. This was done to minimise sample burning due to excessive absorption of excitation light. All data were normalised to the peak of maximum intensity and baseline corrected using standard methods.

### FT-IR and Raman characterisation

Raman spectra were obtained from a polycrystalline sample of  $\text{LH}_2$  and a 1.5% in KBr solid matrix of complex **1**, while FT-IR spectra were obtained from polycrystalline samples of **1** and  $\text{LH}_2$ . The Raman spectra provide information in the 250 to  $700\text{ cm}^{-1}$  spectral region that is not accessible by our FT-IR measurements. For the  $\text{LH}_2$  precursor, the Raman spectrum shows two peaks at 425 and  $530\text{ cm}^{-1}$  with smaller associated bands at 448 and  $518\text{ cm}^{-1}$  respectively. These we tentatively ascribe to out-of-plane ring deformation vibrations.<sup>1</sup> In the complex, only a single band at  $507\text{ cm}^{-1}$  is observed, and this may arise because of the increased rigidity of the complex (Fig. S3).

The intense IR peaks observed at  $743\text{ cm}^{-1}$  ( $\text{LH}_2$ ) and  $753\text{ cm}^{-1}$  (**1**) respectively are attributed to aromatic  $\nu(\text{C-H})$  out-of-plane deformation vibrations, readily observed for 1, 2-disubstituted naphthalene moieties. The equivalent Raman bands are known to be weak in nature and this is confirmed in our Raman measurement where we do not observe any significant bands here (Fig. S4). Likewise the IR (*weak*) and Raman (*strong and sharp*) bands in the  $1587\text{--}1614\text{ cm}^{-1}$  and  $1368\text{--}1379\text{ cm}^{-1}$  regions respectively (Figures S5 and S6) are due to multiple aromatic  $\nu(\text{C}=\text{C})$  stretching vibrations.<sup>1</sup> The bands centred at  $1633\text{ cm}^{-1}$  may be tentatively attributed to the  $\nu(\text{C}=\text{N})$  oxime stretching mode, as observed elsewhere.<sup>2</sup> Attempts at assigning the  $\nu(\text{N-O})$  stretching modes in  $\text{LH}_2$  and **1** are severely hampered by the significant spectral overlap in the  $900\text{--}1150\text{ cm}^{-1}$  region of both the IR and Raman spectra (Figures S1 and S2). Previous reports on ligating aromatic oximes have documented  $\nu(\text{N-O})$  stretching IR bands in the  $\sim 1050\text{--}1250\text{ cm}^{-1}$  spectral range and so should be considered here.<sup>3</sup> However we cannot rule out the presence of multiple C-H out-of-plane deformation vibrational bands.<sup>1</sup> This uncertainty is further compounded by the multiple N-O bonding environments observed in **1**.

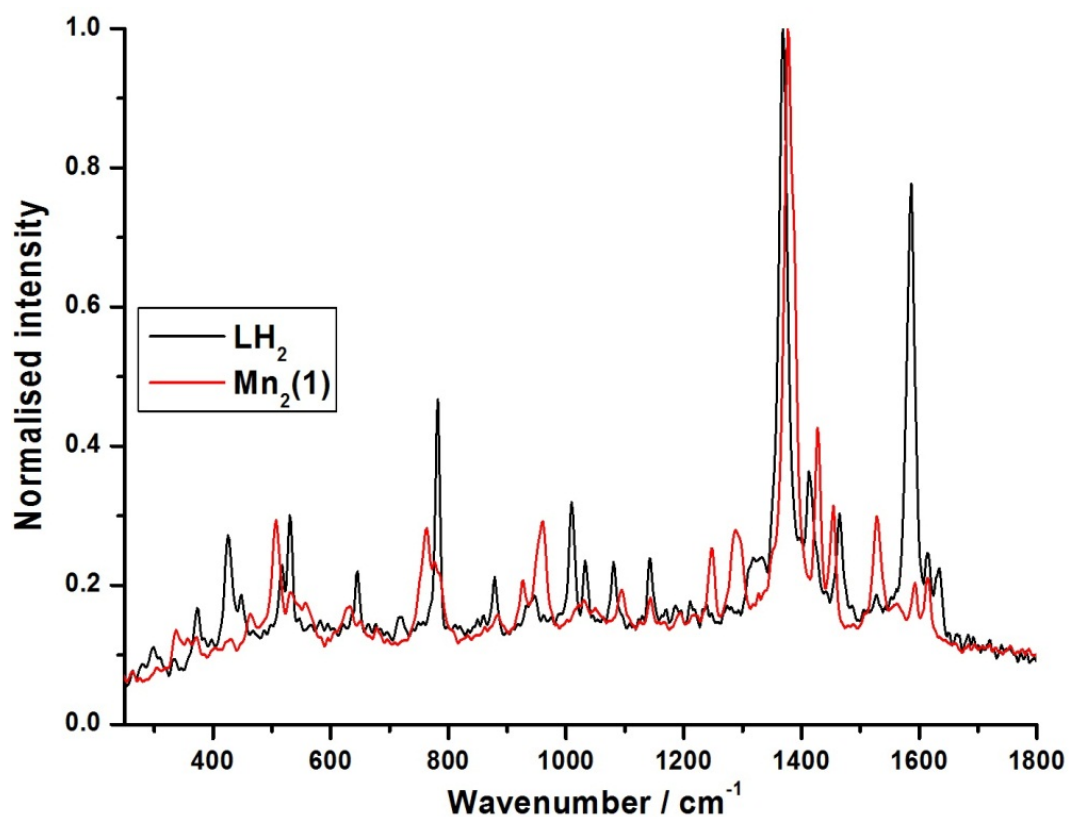

**Fig. S1** Overlay of Raman spectra obtained from  $\text{LH}_2$  (black line) and **1** (red).

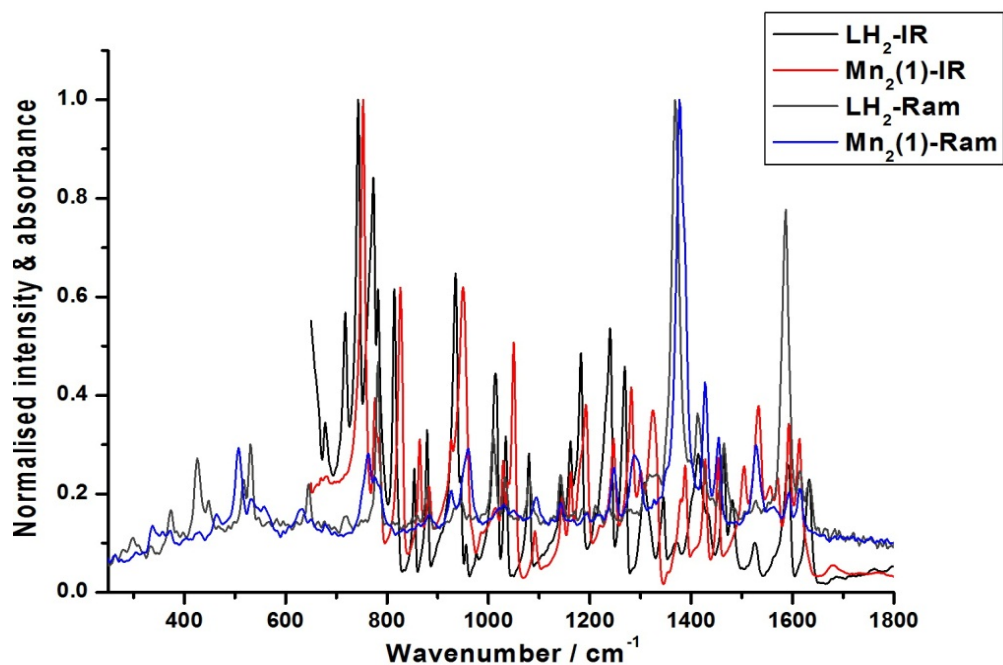

**Fig. S2** Overlay of FT-IR and Raman spectra obtained from  $\text{LH}_2$  (black and grey lines respectively) and **1** (red and blue lines respectively).

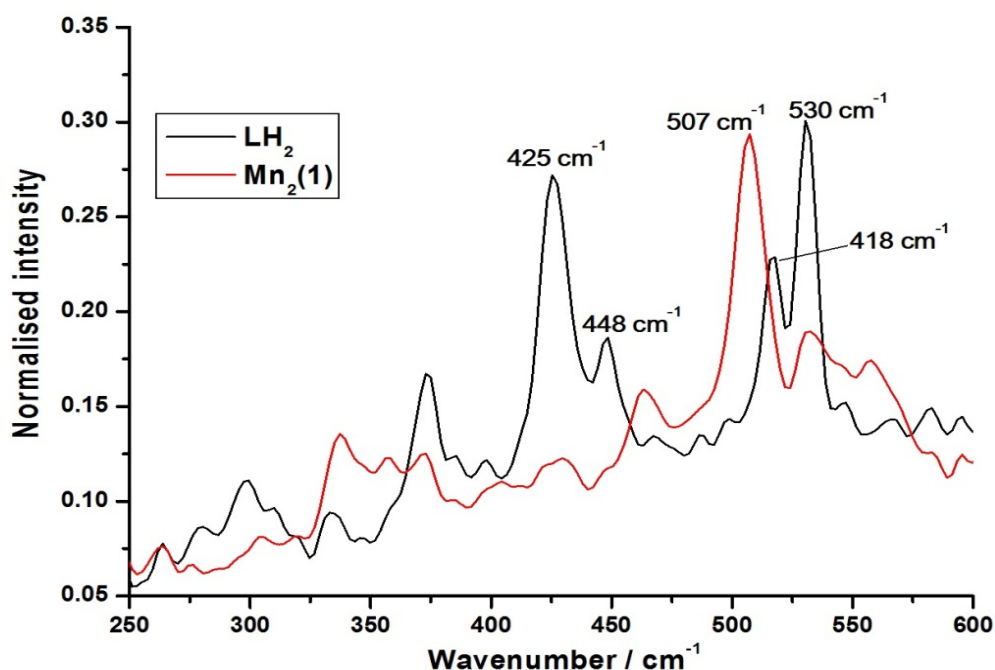

**Fig. S3** Raman spectra (black and red lines) in the 250-600  $\text{cm}^{-1}$  region obtained from crystalline sample of  $\text{LH}_2$  and **1**. All data were normalised and baseline corrected using standard methods.

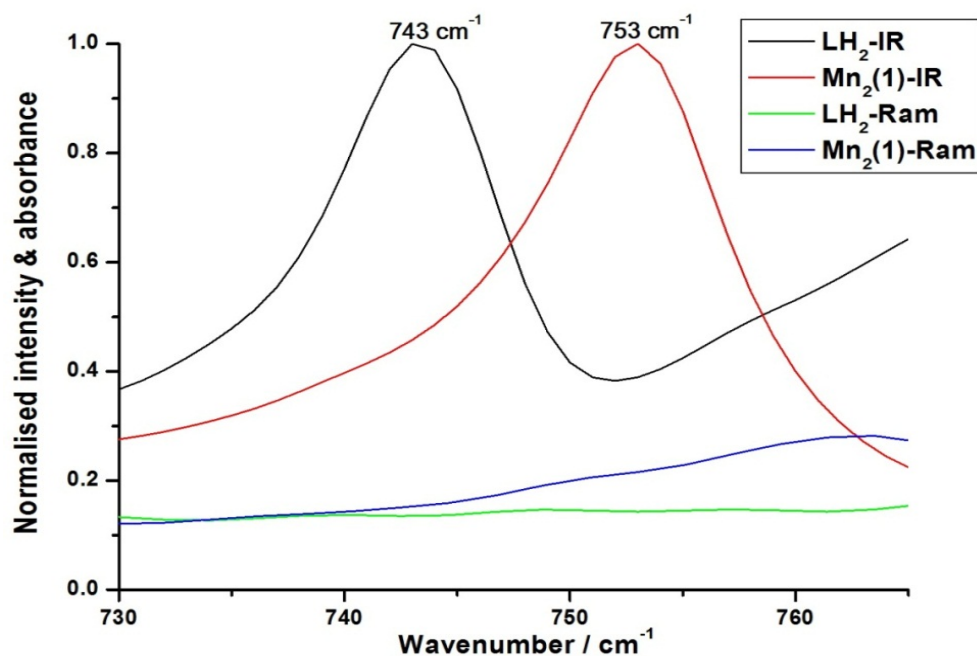

**Fig. S4** Infra-Red (black and red lines) and Raman spectra (green and blue lines) obtained from crystalline sample of  $\text{LH}_2$  and **1**. Data were normalised and baseline corrected using standard methods.

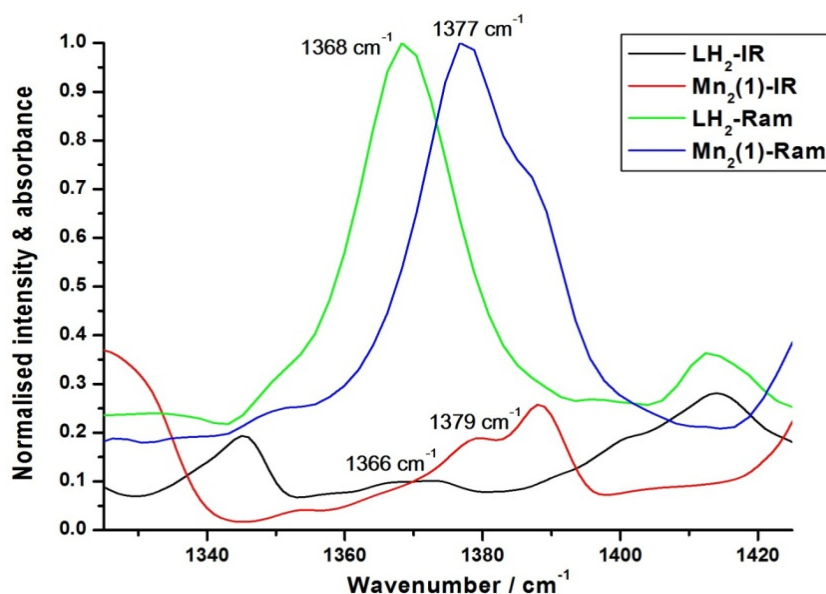

**Fig. S5** Infra-Red (black and red lines) and Raman spectra (green and blue lines) obtained from crystalline sample of  $\text{LH}_2$  and **1** as viewed in the 1300-1420  $\text{cm}^{-1}$  spectral range.

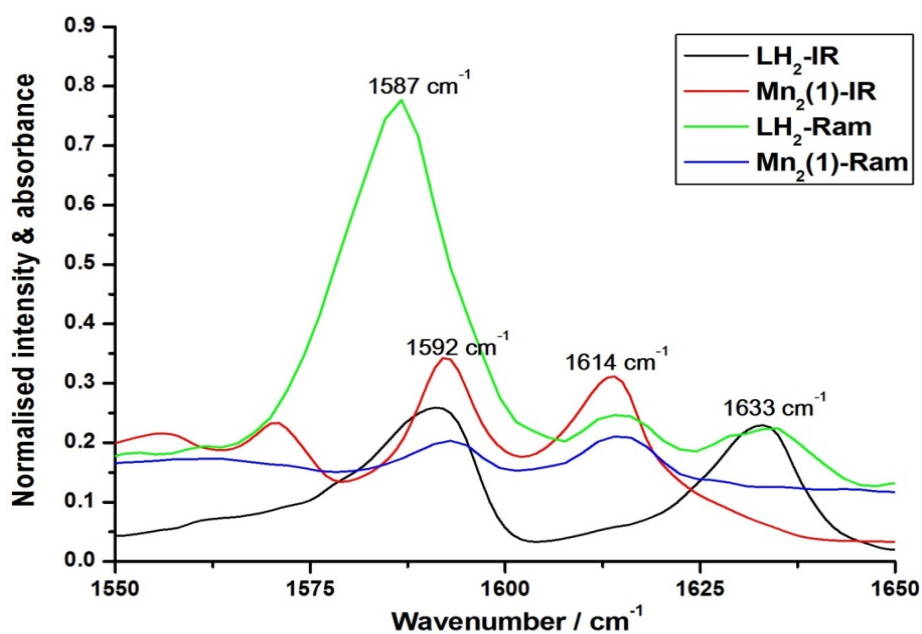

**Fig. S6** Infra-Red (black and red lines) and Raman spectra (green and blue lines) obtained from crystalline sample of  $\text{LH}_2$  and **1**.

## References

1. G. Socrates. *Infra-Red and Raman Characteristic Group Frequencies*. (2004) Wiley VCH Publishing.

2. F. Birkelbach, M. Winter, U. Flörke, H.-J. Haupt, C. Butzlaff, M. Lengen, E. Bill, A. X. Trautwein, K. Wieghardt and P. Chaudhuri. *Inorg. Chem.*, 1994, **33**, 3990-4001.
3. (a) C. Papatriantafyllopoulou, G. Aromi, A. J. Tasiopoulos, V. Nastopulos, C. P. Raptopoulou, S. J. Teat, A. Escuer and S. P. Perlepes. *Eur. J. Inorg. Chem.*, 2007, 2761-2774.  
(b) T. Weyhermüller, R. Wagner, S. Khandra and P. Chaudhuri. *Dalton Trans.*, 2005, 2539-2546. (c) P. Chaudhuri, M. Winter, U. Flörke and H.-J. Haupt. *Inorg. Chim. Acta.*, 1995, **232**, 125-130.
